# Supplementary material for: From Silos to Flows by Redesigning Regional Care for System-Wide Coordination: A Qualitative Study of Organizational Capabilities and Governance in Sweden
Source: Research Square preprint supplement (doi:10.21203/rs.3.rs-8703981/v1), 2026-02-24
Supplement: Supplementary file 1 [file 425ec813b17d2322d28c67f8.docx]

23-03-24

Supplement 1

Interview guide

Future steering of publicly owned health care delivery services (RS 2023-0146).

1. Briefly, can you describe your background and role in the organisation?
2. What is [your organisation’s] role in the health care system?
3. **How would you describe the current steering of publicly owned health care delivery services? (Briefly)**
   1. Overall, why do you believe it is steered in this way? What does it contribute to? What does it contribute to? (*Purpose*)
   2. Advantages and disadvantages with a ”professional non-political board”?
   3. (To CEOs): How has this contributed to your leadership work?
   4. **Obstacles/Challenges with this model?**
      1. Which obstacles/challenges do you experience in your mission?
      2. Which concrete obstacles prevent health care from being developed further?
         1. Are there areas not covered by the model?
         2. Is there anything falling through the cracks?
         3. Are there any overlaps?
4. **How can we utilize our collective resources in publicly owned care in a better way to achieve more efficient care for our inhabitants?**
   - 1. Describe
     2. Why should one steer in this way? What does it contribute to? What does one which to achieve? (*Purpose*)
     3. Do you see any obstacles/challenges with such a model? Ser du några hinder med en sådan modell? Apprehensions?
     4. What consequences will this have for your operation? At clinical level?
     5. **How should co-ordination with private health care providers be arranged?**
5. Which activities could contribute to the overall *purpose*? Give your own suggestions for what should be done within the region to achieve what is wanted from the steering of how to better utilize resources and improve the development of health care.
   1. Activity ________________________
      1. Describe the activity (What?)
      2. What is the purpose of this activity?
      3. What needs to be done in order to achieve this purpose? (How?)
      4. How does this contribute to achieving the *overall purpose*? (Why?)
      5. How will you know if the purpose of the activity has been achieved? (How do you measure?)
   2. Activity ________________________
      1. Describe the activity (What?)
      2. What is the purpose of this activity?
      3. What needs to be done in order to achieve this purpose? (How?)
      4. How does this contribute to achieving the *overall purpose*? (Why?)
      5. How will you know if the purpose of the activity has been achieved? (How do you measure?)
   3. Activity ________________________
      1. Describe the activity (What?)
      2. What is the purpose of this activity?
      3. What needs to be done in order to achieve this purpose? (How?)
      4. How does this contribute to achieving the *overall purpose*? (Why?)
      5. How will you know if the purpose of the activity has been achieved? (How do you measure?)

If time allows

1. How do you think your organisation’s employees experience how health care is currently steered?
   1. At management level?
   2. At clinical level?
2. What kind of support would you need in order to operate your organisation the way you want to?
   1. Should the support you currently receive be changed or altered in any way?
3. Is there anything else you would like to add?
