# Supplementary material for: From Silos to Flows by Redesigning Regional Care for System-Wide Coordination: A Qualitative Study of Organizational Capabilities and Governance in Sweden
Source: Research Square preprint supplement (doi:10.21203/rs.3.rs-8703981/v1), 2026-02-24
Supplement: Supplementary file 2 [file 707c10f01dbec4249a6b619f.docx]

**Supplement 2**

Detailed presentation of coding frequencies by CCIC category supplemented with inductive categories capturing percieved outcomes and suggested improvements.

| Level 1 | Level 2 | Level 3 | Codes |
| --- | --- | --- | --- |
| External Environment |  |  | 6 |
| Basic Structures |  |  |  |
|  | Physical Features |  | 4 |
|  | Resources |  | 20 |
|  | Organizational/Network Design |  | 35 |
|  | Governance |  | 27 |
|  | Accountability |  | 8 |
|  | Information Technology |  | 3 |
|  | OTHER Basic Structures |  | 5 |
| People and Values |  |  |  |
|  | Leadership Approach |  | 1 |
|  | Clinician Engagement and Leadership |  | 4 |
|  | Patient-Centeredness and Engagement |  | 1 |
|  | Organizational/Network Culture |  | 31 |
|  | Commitment to Learning |  | - |
|  | Readiness for Change |  | 1 |
|  | Work Environment |  | - |
|  | OTHER People and Values |  | 2 |
| Key Processes |  |  |  |
|  | Partnering |  | 10 |
|  | Delivering Care |  | 1 |
|  | Measuring Performance |  | 20 |
|  | Improving Quality |  | - |
|  | OTHER Key Processes |  | 5 |
| Outcomes |  |  |  |
|  | Declining quality at system level |  | 7 |
|  | Fragmentation and complexity inhibit collaboration |  | 12 |
|  |  | Rigid rules regarding shared employment result in braindrain from publicly owned care | 7 |
|  | Ambiguous steering |  | 8 |
|  |  | The purchaser’s internal transaction system results in inefficiencies in care | 21 |
|  |  | Interference from politicians becomes time-consuming | 5 |
|  | Reimbursement model causes increased care volumes and set complex cases aside |  | 16 |
| Suggestions for improvement |  |  |  |
|  | Give one organisation responsibility for the functioning of the entire system to counteract fragmentation |  | 22 |
|  | Create a cohesive production organisation steered in a decentralised way |  | 43 |
|  | Create regional flows according to functional organisational principles |  | 10 |
| Characteristics of the Integrated Care Intervention |  |  | - |
| Characteristics of the Patient Population |  |  | - |
| OTHER OTHER |  |  | 21 |
|  |  | Total | 356 |
